# Supplementary material for: Rapid pathway prototyping and engineering using in vitro and in vivo synthetic genome SCRaMbLE-in methods
Source: PubMed Central journal article supplement (PMC5964202; doi:10.1038/s41467-018-04254-0), 2018-05-22
Supplement: 41467_2018_4254_MOESM2_ESM.pdf [file 41467_2018_4254_MOESM2_ESM.pdf]

## **Description of Additional Supplementary Files**

File Name: Supplementary Data 1

Description: Detailed information of genotype variations of the SCRaMbLEd strains and annotations of the affected coding sequences, plus recombinase sequences, plasmid and strain tables.
